# The Effect of Flexible Low Glycemic Index Dietary Advice Versus Measured Carbohydrate Exchange Diets on Glycemic Control in Children With Type 1 Diabetes

HEATHER R. GILBERTSON, GDD<sup>1</sup>  
JENNIE C. BRAND-MILLER, PHD<sup>4</sup>  
ANNE W. THORBURN, PHD<sup>5</sup>

SHARON EVANS, MND<sup>1</sup>  
PATTY CHONDROS, MSC<sup>2</sup>  
GEORGE A. WERTHER, MD<sup>3</sup>

**OBJECTIVE** — To determine the long-term effect of low glycemic index dietary advice on metabolic control and quality of life in children with type 1 diabetes.

**RESEARCH DESIGN AND METHODS** — Children with type 1 diabetes ( $n = 104$ ) were recruited to a prospective, stratified, randomized, parallel study to examine the effects of a measured carbohydrate exchange (CHOx) diet versus a more flexible low-glycemic index (GI) dietary regimen on HbA<sub>1c</sub> levels, incidence of hypo- and hyperglycemia, insulin dose, dietary intake, and measures of quality of life over 12 months.

**RESULTS** — At 12 months, children in the low-GI group had significantly better HbA<sub>1c</sub> levels than those in the CHOx group ( $8.05 \pm 0.95$  vs.  $8.61 \pm 1.37\%$ ,  $P = 0.05$ ). Rates of excessive hyperglycemia ( $>15$  episodes per month) were significantly lower in the low-GI group (35 vs. 66%,  $P = 0.006$ ). There were no differences in insulin dose, hypoglycemic episodes, or dietary composition. The low-GI dietary regimen was associated with better quality of life for both children and parents.

**CONCLUSIONS** — Flexible dietary instruction based on the food pyramid with an emphasis of low-GI foods improves HbA<sub>1c</sub> levels without increasing the risk of hypoglycemia and enhances the quality of life in children with diabetes.

*Diabetes Care* 24:1137–1143, 2001

Type 1 diabetes is one of the most challenging medical disorders because of the demands it imposes on day-to-day life. Good glycemic control, as judged by HbA<sub>1c</sub> levels, is clearly related to reduced risk of microvascular complications (1). Although diet plays a major

role in the overall management of type 1 diabetes, it is often classed as the most difficult aspect of treatment (2,3). Furthermore, there are surprisingly few long-term studies to support current dietary recommendations. Weighed carbohydrate “exchanges,” introduced in the

1950s, have been used to ensure an even distribution of complex carbohydrates throughout the day. Carbohydrate counting and higher carbohydrate intake are now recommended, although in practice, emphasis is still placed on limiting carbohydrates to a specified level and avoiding refined sugars (4,5).

Different carbohydrate foods affect blood glucose levels to varying degrees, as measured by their glycemic index (GI) (6,7). Foods such as legumes and dairy products have a low GI, whereas ordinary breads, potatoes, and rice have a high GI (8). Carbohydrate counting and “exchange” diets imply that equal carbohydrate portions have the same effect on glycemia. Not only is the theoretical basis of the exchange system questionable, it is difficult to understand and implement without knowing the carbohydrate content of food (9). Several studies have shown that exchange diets do not improve glycemic control (9,10) and that many children with diabetes and their parents cannot understand or follow them (11–13). It has also been suggested that quantifying carbohydrate intake may be associated with some physiological and psychological problems, including disordered eating behavior (14). This information and the emerging significance of postprandial glycemia on diabetes-related complications suggest that carbohydrate quantity alone is not an adequate basis for controlling blood glucose levels. Research shows low-GI diets significantly improve metabolic control in adults with type 2 diabetes (15–18). However, there are very few studies on the use of low-GI diets in type 1 diabetes (19–21) and only one small short-term study in children (22). Differences in GI between foods are just as likely to apply to children as to adults (22,23), but more studies are

From the <sup>1</sup>Department of Nutrition and Food Services, the <sup>2</sup>Department of Clinical Epidemiology and Biostatistics, and the <sup>3</sup>Department of Endocrinology and Diabetes, Royal Children's Hospital, Melbourne; the <sup>4</sup>Human Nutrition Unit, Department of Biochemistry, University of Sydney; and the <sup>5</sup>Department of Medicine, University of Melbourne, Royal Melbourne Hospital, Melbourne, Australia.

Address correspondence and reprint requests to Heather R. Gilbertson, Department of Nutrition and Food Services, Women's and Children's Health Care Network, Royal Children's Hospital, Melbourne, Parkville, VIC, Australia 3052. E-mail: gilberth@cryptic.rch.unimelb.edu.au.

Received for publication 19 October 2000 and accepted in revised form 26 March 2001.

**Abbreviations:** BMR, basal metabolic rate; CHOx, carbohydrate exchange; GI, glycemic index; NMES, nonmilk extrinsic sugars; RCH, Royal Children's Hospital.

A table elsewhere in this issue shows conventional and Système International (SI) units and conversion factors for many substances.

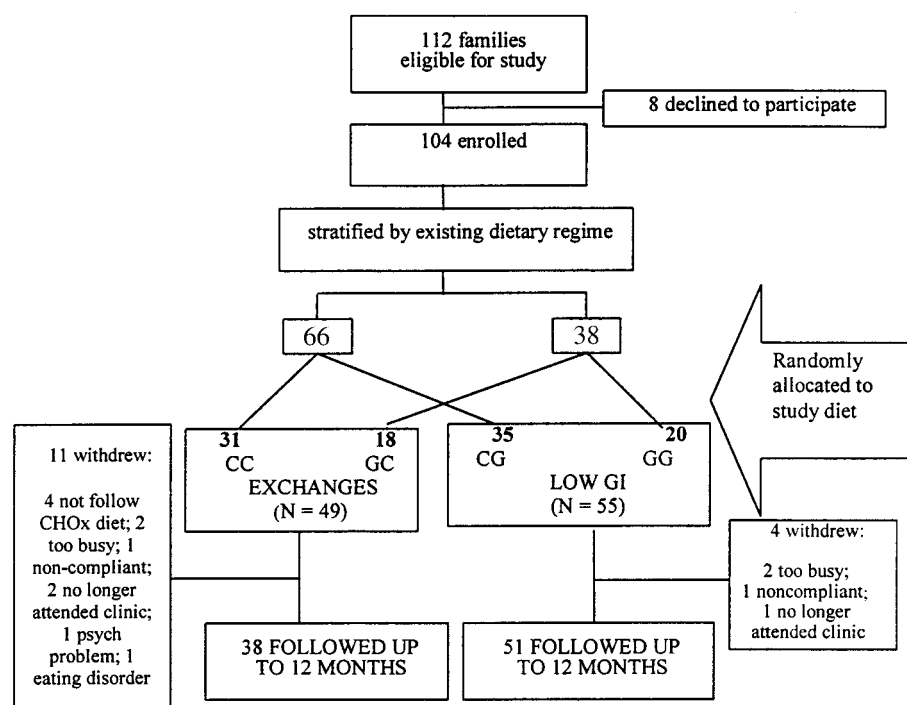

**Figure 1—Trial Profile.** CC, those who only received instructions on the CHOx diet both prior and during the study; GG, those only instructed in the low-GI diet both prior and during the study; CG, those randomized to the low-GI diet who had been following a CHOx diet before the study; GC, those randomized to the CHOx diet who had been following the low-GI diet before the study.

needed on the long-term effect of low-GI diets in children with type 1 diabetes.

We hypothesized that less regimented dietary instruction with an emphasis on the use of low-GI foods may enhance metabolic control and compliance in a pediatric population. This randomized prospective trial compares the effects of flexible, low-GI dietary advice and the measured carbohydrate exchange (CHOx) diet on glycemic control, nutritional intake, and quality-of-life measures in children with type 1 diabetes over a 12-month period.

## RESEARCH DESIGN AND METHODS

### Study design

Figure 1 summarizes the trial profile used in this study. Children attending the Melbourne Royal Children's Hospital (RCH) Diabetes Clinic were selected using the following criteria: 1) age between 8 and 13 years, diagnosis of type 1 diabetes for longer than one year, and regular attendance at the clinic (3 monthly); 2) no additional dietary restrictions; 3) no other immediate family members with diabetes,

4) no medications that would affect appetite; and 5) family able to read and write English.

Agreement from the primary physician was sought. Of 112 eligible families, 104 agreed to participate, and letters were sent outlining their involvement in the study. Formal written consent was obtained. Subjects were assigned random number codes to ensure patient confidentiality. Ethics approval was granted by the RCH Ethics in Human Research Committee.

### Diet assessment and education

Individual interviews with the research dietitian were used to collect initial data, instruct the child and parent in the use of food records, and develop a rapport to enhance participation over the 12-month period. Each subject was asked to complete a 3-day food diary. Two weekdays and one weekend day were specified to account for the variation in food intake at weekends (24). Families were encouraged not to alter their usual pattern of food intake during recording periods. A sample food diary and a contact phone number were provided.

At the beginning of the study, subjects were assessed by a dietitian to categorize their existing dietary regime and ensure correct stratification before being randomized to either the CHOx or low-GI diet. Computer-generated random numbers of 1 and 2 were generated in blocks of 10 and assigned consecutively to each subject upon recruitment to the study. Of the 104 subjects recruited, 49 were assigned to the CHOx diet, and 55 were assigned to the low-GI diet (Fig. 1). Education regarding the allocated study diet was then given to the child and parent (Table 1). The diet education session was structured similarly for both groups and executed in an outpatient setting by the same clinical dietitian. A specially made flipchart was used for each of the study diets explaining the principles of the diet. Literature was also provided to reinforce the advice (Table 1). No additional education sessions were planned over the 12-month period apart from usual clinic review. The food diaries were completed at 1, 3, 6, and 12 months, and phone calls were made 2 weeks before the clinic visit to ensure compliance.

All food diaries were analyzed by the same research dietitian using the Diet 3.12 computer program (Xyris Software). Portion sizes were estimated against standard portions within the software package based on the household measures recorded. If the food item was not included in the database or if the nutrient profile was incomplete, information from the manufacturer was sought or, alternatively, the most similar food item was substituted. The individual's intake of energy, protein, fat, fiber, total carbohydrates, total sugars (with inclusion and exclusion, respectively, of sugars consumed for hypoglycemic treatment or used during exercise), nonmilk extrinsic sugars (NMES), GI, and carbohydrate distribution were calculated using the food diaries at each time point. NMES content was estimated from the food sources of total sugars, information from the food manufacturer, and food composition tables (25).

Energy intake was independently assessed as being below, within, or above range. Ranges were based on basal metabolic rate (BMR) calculations using cutoff points from published sources. BMR was calculated using Schofield's equation (26). The minimum and maximum cutoff points were derived from the work of, re-

Table 1—Dietary advice given to subjects randomized to the CHOx or low-GI diet at entry to the study

|                                     | CHOx study diet†‡                                                                                                                                                                                                                         | Low-GI study diet§                                                                                                                                                                                                            |
|-------------------------------------|-------------------------------------------------------------------------------------------------------------------------------------------------------------------------------------------------------------------------------------------|-------------------------------------------------------------------------------------------------------------------------------------------------------------------------------------------------------------------------------|
| Carbohydrate                        | Measured in 15-g complex CHO quantities and counted as either 'half' or 'full' exchanges                                                                                                                                                  | Eat regular meals and snacks based on preferred serving sizes of CHO foods to satisfy appetite<br>A serving is suggested to be the quantity of CHO food that fits into the child's hand (which will vary between individuals) |
| Recommendations                     | Based on quantitative CHO intake assuming all complex CHO foods affect the blood sugar level in the same way                                                                                                                              | Based on qualitative CHO intake using principles of the healthy food pyramid with low GI emphasis, aiming for minimum of one low-GI food per meal per day                                                                     |
| Prescription                        | Set number of exchanges for each meal and snack                                                                                                                                                                                           | Nil prescription given and guide given to number of servings at meals/snacks to ensure appropriate CHO distribution and consistency, but no specific quantity defined                                                         |
| Protein/fat foods                   | Not measured but eat in moderation<br>Choose low fat sources where appropriate<br>Not counted as part of exchange prescription unless in pastry/battered/ crumbed                                                                         | Not measured but eat in moderation<br>Choose low fat sources where appropriate<br>Not counted as a serving unless in pastry/battered/ crumbed                                                                                 |
| Low-CHO foods (most vegetables)     | Identify low-CHO food sources, eaten in conjunction with correct exchanges or when hungry as "free" foods                                                                                                                                 | Identify low-CHO food sources, eaten as part of a balanced diet                                                                                                                                                               |
| Diet foods (artificially sweetened) | Use strongly encouraged whenever a diet alternative was available                                                                                                                                                                         | Use strongly discouraged with preference for use of sugar-sweetened products in moderation (only exception to this being diet drinks)                                                                                         |
| Sugar                               | Use limited to treatment of hypoglycemia episodes exercise, or special occasions only                                                                                                                                                     | Use in moderation in combination with mixed meals (1.5–2.5 tbs per day)                                                                                                                                                       |
| Literature provided                 | Extensive food lists that quantified all foods/ingredients into 15-g CHO measures*†                                                                                                                                                       | Basic booklet including list of low-GI food sources§                                                                                                                                                                          |
| Appetite                            | Eat only free foods/low-CHO foods if hungry between meals/snacks                                                                                                                                                                          | Low-GI foods listed, but no actual GI values provided<br>Eat extra CHO foods to appetite, particularly low GI foods                                                                                                           |
| Recipe modification                 | List of diabetes cookbooks recommended<br>Sugar to be substituted with artificial sweetener                                                                                                                                               | No specific diabetes cookbook recommended<br>Encouraged to modify existing recipes and moderate use of sugar                                                                                                                  |
| Label reading                       | Shown how to calculate individual recipe ingredients to determine exchange value of baked product<br>Focus on dividing total grams CHO in nutrition panel by 15 to determine exchange value and limiting/avoiding products high in sugars | Incorporate low-GI ingredients where appropriate<br>Focus on ingredient list and sources of sugars, fats, fiber, and low-GI ingredients and the order in which they appear on the label                                       |
| Activity/exercise                   | Eat one extra exchange per hour of strenuous activity                                                                                                                                                                                     | Eat one extra serve of CHO food per hour of strenuous activity                                                                                                                                                                |

Literature provided to reinforce advice:

\**Traffic Light Guide To Eating*. Gilbertson H, Ed. Melbourne, Australia, Nutrition and Dietetic Department, Royal Children's Hospital, 1992; †*The A to Z Carbohydrate Exchange Booklet for Diabetes*. Gilbertson, H, Ed. Melbourne, Australia, Nutrition and Dietetic Department, Royal Children's Hospital, 1993; ‡*Modern Living With Diabetes: For All Ages*. 2nd ed. Court JM, Ed. Melbourne, Australia, Diabetes Australia Victoria, 1991; §*Diabetes: A Guide to Eating*. Gilbertson H, Ed. Melbourne, Australia, Department of Nutrition and Food Services, Royal Children's Hospital, 1996; ||*The GI Factor: The Glucose Revolution*. Brand-Miller J, Foster-Powell K, Colagiuri S, Eds. Sydney, Australia, Hodder and Stoughton, 1998.

spectively, Goldberg et al. (27), using a value of  $0.8 \times \text{BMR} \times \text{activity factor}$ , and Torun et al. (28). Activity levels were individually assessed and defined as light (<2 organized activities per week), moderate (2–5 organized activities per week), and heavy (>5 organized activities per week). Activity factors were 1.55, 1.75, and 1.95, respectively.

For the purpose of dietary analysis, the daily GI (relative to a standard glucose

value of 100) was calculated by summing the following: [grams of carbohydrate from the food item / total daily carbohydrate  $\times 100 \times \text{GI of food item}$ ]. GI values were derived from published GI tables (8) and unpublished data from the Human Nutrition Unit, University of Sydney. Of 284 carbohydrate-containing foods, 194 were assigned a known GI, but 90 were given "estimated" values based on the GI of similar foods.

## Outcome measures

The following measures were recorded at entry to the study and at 3, 6, and 12 months: HbA<sub>1c</sub> level, weight, height, dietary intake information, and incidence of hypoglycemia (<3.5 mmol/l) and hyperglycemia (>15 mmol/l) as determined by preprandial breakfast, dinner, and supper levels charted in the child's self-reported record book during the 1 month before each visit. In addition, a quality-of-life

Table 2—Demographic data, baseline and outcome measures for subjects assigned to the CHOx and low-GI diet groups

| Variable                                                 | Study diet       |                    | P    | Study diet       |                    | P*   |
|----------------------------------------------------------|------------------|--------------------|------|------------------|--------------------|------|
|                                                          | CHOx<br>(n = 49) | Low GI<br>(n = 55) |      | CHOx<br>(n = 38) | Low GI<br>(n = 51) |      |
| Demographic data:                                        |                  |                    |      |                  |                    |      |
| Sex (% male)                                             | 51               | 49                 | 0.84 |                  |                    |      |
| Age (years)                                              | 10.2 ± 1.6       | 10.7 ± 1.6         | 0.11 |                  |                    |      |
| Duration of diabetes (years)‡                            | 4.0 (1.1–9.9)    | 3.4 (1.3–12.2)     | 0.83 |                  |                    |      |
| Parents' marital status (% married)†                     | 84               | 89                 | 0.69 |                  |                    |      |
| Socioeconomic status§                                    |                  |                    |      |                  |                    |      |
| Father's occupation                                      | 4.2 (2.3–6.5)    | 4.1 (1.5–6.6)      | 0.89 |                  |                    |      |
| Mother's occupation                                      | 5.3 (3.6–6.66)   | 5.3 (2.3–6.4)      | 0.10 |                  |                    |      |
| Clinical measures:                                       |                  |                    |      |                  |                    |      |
|                                                          | Baseline values  |                    |      | 12 Months        |                    |      |
| HbA <sub>1c</sub> (%)                                    | 8.6 ± 1.4        | 8.3 ± 1.3          | 0.12 | 8.6 ± 1.4        | 8.0 ± 1.0          | 0.05 |
| Insulin dose (U/kg)                                      | 0.9 ± 0.3        | 1.0 ± 0.3          | 0.15 | 1.0 ± 0.3        | 1.1 ± 0.3          | 0.87 |
| Insulin injection regimen (% on two injections per day)† | 98               | 95                 | 0.62 | 98               | 91                 | 0.21 |
| Episodes of hyperglycemia (mean number per month)        | 14.8 ± 11.2      | 11.7 ± 9.4         | 0.08 | 116.8 ± 11.8     | 11.2 ± 9.8         | 0.06 |
| Episodes of hypoglycemia (mean number per month)         | 7.3 ± 5.7        | 6.9 ± 6.2          | 0.73 | 5.8 ± 5.5        | 6.9 ± 6.8          | 0.37 |

Data are mean ± SD or %. \*P using multiple linear regression adjusting for the appropriate baseline measure; †P using Pearson's  $\chi^2$  analysis or Fisher's exact test where appropriate; ‡P using Wilcoxon's rank-sum test without adjustment for baseline measure; §Daniel's Prestige Scale, reported as median (range), P using Wilcoxon's rank-sum test.

questionnaire was completed independently by the parent and child (via separate interview) at each time point. HbA<sub>1c</sub> measurements were routinely performed in the clinic using the DCA 2000 Analyser (Bayer) on capillary blood samples obtained by fingerprick (mean coefficient of variation 3.8%).

### Statistical analysis

The sample size of 104 families allowed for a 15% dropout rate and provided 80% power to reject the null hypothesis, which stated that mean HbA<sub>1c</sub> levels after 12 months were the same in the two groups if a 10% difference (i.e., a difference in measured HbA<sub>1c</sub> of  $\approx 1\%$ ) was found. Significance was set at 5%. The sample size calculation was based on an effect size of 0.625 SD. A subgroup analysis was planned prospectively that divided the subjects into four subgroups, as illustrated by Fig. 1. An intent-to-treat analysis was performed on the assumption that subjects adhered to the dietary advice provided at entry to the study. Data analysis and clinical outcome measures were assessed by researchers unaware of the treatment allocation.

Results were expressed as the mean ± SD, unless otherwise stated, and were analyzed using multiple linear regression or Spearman's correlation for continuous variables or with a combination of logistic

regression or Pearson's  $\chi^2$  analysis for categorical data. Nonnormal data were analyzed using Wilcoxon's rank-sum test and expressed as medians and ranges. Clinical data were adjusted for baseline values where specified. All statistical analysis was performed using the Intercooled Stata 5.0 Statistical package (Stata Corporation).

**RESULTS**— There were no significant differences in baseline measures or demographic data between the two study groups (Table 2). A total of 15 subjects (14%) dropped out during the study period: 11 from the CHOx group and 4 from the low-GI group. There was a significantly higher dropout rate from the

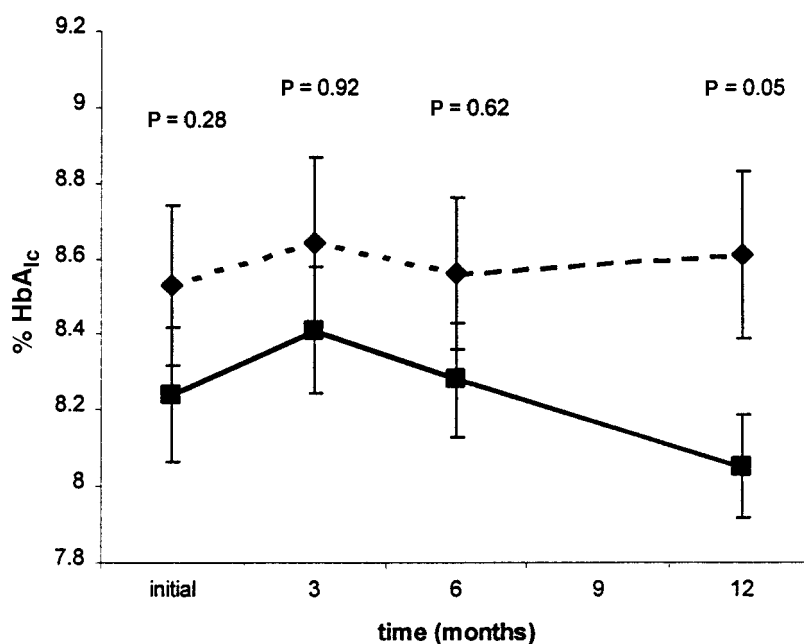

Figure 2—Mean (± SE) HbA<sub>1c</sub> measurements over 12 months for CHOx (—◆—) and low-GI (—■—) subjects who completed the study (n = 38 and 51, respectively). Analysis adjusted for baseline HbA<sub>1c</sub> values.



Table 3—Comparison of responses of subjects from each subgroup who expressed a preference

| Question/Response                                                              | Child diet subgroup |             |             |        | Parent diet subgroup |             |             |        |
|--------------------------------------------------------------------------------|---------------------|-------------|-------------|--------|----------------------|-------------|-------------|--------|
|                                                                                | CHOx only           | Low GI only | Both types† | P*     | CHOx only            | Low GI only | Both types* | P*     |
| Which diet do you believe would be easier to follow?‡                          |                     |             |             |        |                      |             |             |        |
| n                                                                              | 14                  | 11          | 22          | —      | 13                   | 13          | 23          | —      |
| Exchanges                                                                      | 57                  | 0           | 36          | —      | 69                   | 0           | 9           | —      |
| Low-GI                                                                         | 43                  | 100         | 64          | <0.01  | 31                   | 100         | 91          | <0.001 |
| Which diet do you believe would lead to better control of blood sugar levels?  |                     |             |             |        |                      |             |             |        |
| n                                                                              | 15                  | 6           | 25          | —      | 10                   | 10          | 17          | —      |
| Exchanges                                                                      | 87                  | 33          | 64          | —      | 100                  | 0           | 6           | —      |
| Low-GI                                                                         | 13                  | 67          | 36          | 0.05   | 0                    | 100         | 94          | <0.001 |
| Now that you have completed the study, which diet will you choose to continue? |                     |             |             |        |                      |             |             |        |
| n                                                                              | 26                  | 17          | 45          | —      | 24                   | 17          | 43          | —      |
| Exchanges                                                                      | 92                  | 6           | 27          | —      | 88                   | 0           | 12          | —      |
| Low-GI                                                                         | 8                   | 88          | 71          | —      | 8                    | 100         | 70          | —      |
| Combination of both                                                            | 0                   | 6           | 2           | <0.001 | 4                    | 0           | 18          | <0.001 |

Data are %. \*P value using Fisher's exact test; †subjects who had been exposed to the two different dietary regimes; ‡subjects who either expressed no preference or were unsure were excluded from this analysis. Percentage responding with preference: child, 43% CHOx vs. 61% low-GI,  $P = 0.13$ ; parent, 49% CHOx vs. 61% low-GI,  $P = 0.28$ ; §subjects who either expressed no preference or were unsure were excluded from this analysis. Percentage responding with preference: child, 59% CHOx vs. 47% low-GI,  $P = 0.29$ ; parent, 35% CHOx vs. 48% low-GI,  $P = 0.28$ .

CHOx group (22 vs. 7% in the CHOx and low-GI groups, respectively,  $P = 0.03$ ). Specifically, there was a differential drop-out rate of 39% for subgroup GC, who had been assigned to the CHOx diet for the study after previously following the low-GI diet, versus subgroups CC (13%), GG (15%), and CG (3%) ( $P < 0.01$ ), who were, respectively, only instructed in the CHOx diet, only instructed in the low-GI diet, or randomized to the low-GI diet after following a CHOx diet prior to the study. Apart from dietary assignment, there were no other significant differences at baseline between these subjects.

At baseline, 3, and 6 months, there were no statistically significant differences in HbA<sub>1c</sub> levels between the groups. However, by 12 months the mean HbA<sub>1c</sub> level had fallen in those provided low-GI dietary instruction while remaining essentially unchanged in the CHOx group (Fig. 2). The difference between groups at 12 months was significant, even after adjusting for baseline values ( $P = 0.05$ , Table 2). Subjects who had been given low-GI dietary instruction both before and during the study (subgroup GG) had markedly lower HbA<sub>1c</sub> values at the end of 12 months ( $7.77 \pm 0.79\%$ ) compared with subjects who had only received CHOx advice (subgroup CC) ( $8.76 \pm 1.07\%$ ,  $P = 0.002$ ).

The differences in HbA<sub>1c</sub> levels were not related to variations in insulin therapy because there were no significant differences in insulin dose at 12 months nor were there changes to insulin dose over the 12 months (Table 2). The majority of subjects from both groups were on a twice-daily insulin regimen (Table 2), using regular short- and long-acting insulin types at baseline (96 vs. 98% in the CHOx and low-GI groups, respectively,  $P = 0.27$ ) and at 12 months (89 vs. 88%,  $P = 0.21$ ).

The proportions of subjects from each study group within acceptable and unacceptable HbA<sub>1c</sub> ranges were compared. The acceptable cutoff was  $<8\%$  (29) and levels  $>9\%$  were considered suboptimal. At 12 months, twice as many subjects from the low-GI group (45%) had HbA<sub>1c</sub> values within the acceptable range compared with subjects in the CHOx group (22%) ( $P = 0.02$  after adjustment for baseline values). Subjects in the CHOx group were  $\sim 3$  times more likely to have undesirable HbA<sub>1c</sub> values compared with the low-GI group (47 vs. 18%,  $P = 0.004$  after adjustment for baseline values).

A significantly larger proportion of subjects from the CHOx group reported more frequent episodes of hyperglycemia at 12 months, defined as  $>15$  episodes

per month (66 vs. 35%,  $P = 0.006$  after adjustment for baseline values). There were no significant differences in hypoglycemic episodes (Table 2).

Of the 89 subjects who completed the study, 6 did not complete a food diary. The two study groups showed no significant differences in any of the dietary variables measured at 12 months. On average, the children consumed 17% energy as protein, 34% as fat, 49% as carbohydrate, and 7% as NMES, and they consumed 21 g fiber per day. However, there was a high proportion of subjects who appeared to underreport food intake in both groups (53 vs. 46% in the CHOx and low-GI groups, respectively), casting doubt on the reliability of the food diaries. The dietary variables were reanalyzed, excluding underreporters but otherwise remaining essentially unchanged.

Surprisingly, despite differences in dietary instruction, there was no difference in mean GI between the two groups ( $56.5 \pm 4.0$  and  $55.3 \pm 4.8$  in the CHOx and low-GI groups, respectively,  $P = 0.26$ ). Because GI is not a precise measure, we compared the proportions of subjects that had a low ( $<55$ ), moderate (55–60), and high ( $>60$ ) GI. At all time points, the low-GI group showed a greater proportion of subjects within the low (GI  $<55$ ) range (low GI: 62, 47, 47,

and 44%; CHOx: 37, 40, 36, and 30% at 1, 3, 6, and 12 months, respectively), but the difference reached statistical significance only at one month ( $P = 0.02$ ). The low-GI group also contained more subjects who achieved an extremely low average GI ( $<50\%$ ), (0 vs. 14% in the CHOx and low-GI groups, respectively,  $P = 0.04$  at 12 months). From a food variety perspective, the average number of different carbohydrate food choices per day was similar between the two groups ( $9.9 \pm 2.5$  vs.  $10.8 \pm 2.4$ ,  $P = 0.10$ ).

In correlation analyses, no dietary factor correlated significantly with HbA<sub>1c</sub> levels. The reported physical activity level was not different between the dietary groups (median number of organized activities per week [range]: 4.0[1–10] and 4.5[1–10] in the CHOx and low-GI groups, respectively,  $P = 0.75$ ) and showed no relationship to HbA<sub>1c</sub> level.

Quality of life was influenced significantly by type of dietary instruction. Twice as many parents in the low-GI group stated that their child had no difficulties in selecting their own meals at the 12-month time point (51 vs. 24%  $P = 0.01$ ). Almost twice as many parents from the low-GI group reported that diabetes never limited the types of activities pursued as a family (53 vs. 27%  $P = 0.02$ ) and that diabetes had never been a source of tension or conflict within the family (55 vs. 27%  $P = 0.01$ ). There was a trend for the majority of parents from the low-GI group to believe that diabetes never interrupted various everyday family activities (53 vs. 32%  $P = 0.06$ ).

The 53 children (and their parents) that had experienced both types of dietary approaches (subgroups CG and GC) expressed an overall preference for the low-GI diet compared with the CHOx diet (Table 3,  $P < 0.01$  and  $P < 0.001$  for the children and parents, respectively). The same subgroup of parents believed that the low-GI diet led to better control of blood glucose levels compared with the CHOx diet ( $P < 0.001$ ). The low-GI diet was the dietary regime that most parents and children selected to continue after completion of the study ( $P < 0.001$  and  $P < 0.001$  for the children and parents, respectively).

**CONCLUSIONS**— This study demonstrated that children with type 1 diabetes who were given flexible dietary instruction based on the food pyramid

and low-GI choices achieved significantly better HbA<sub>1c</sub> levels after 12 months compared with those who received more traditional dietary advice. Twice as many children in the low-GI group achieved acceptable HbA<sub>1c</sub> levels at 12 months without any increase in the frequency of hypoglycemic episodes. Insulin dose and injection regime did not change or differ between the groups.

The difference in glycemic control was greater and more significant in the children who had received the same dietary instruction both before and throughout the study. This suggests that some aspect of the flexible low-GI approach was associated with gradual but sustained improvement in HbA<sub>1c</sub> levels. However, it is difficult to attribute the lower HbA<sub>1c</sub> levels solely to differences in diet, particularly when there was no apparent difference in mean GI.

The dietary records showed that macronutrient and fiber intakes were very close to that of children in the general Australian population (30) and were similar in both groups. However, the dietary data need to be interpreted cautiously because of the unacceptably high prevalence of underreporting. About half the records revealed energy intakes that were not likely to reflect the child's habitual intake. This criticism plagues all dietary assessment studies (31,32) and is especially true of those in children. The high rate of underreporting may have affected the ability to detect subtle differences in carbohydrate quality (mean GI) between the two study groups. The large number of foods with estimated GI values may also have contributed. Despite these limitations, the assumption that a low-GI diet might restrict food variety and increase fat or sugar intake was not borne out by the data (33). Many low-GI foods were particularly favored by the children, including peanut butter, pasta, baked beans, and dairy foods. Given the documented differences in hyperglycemic episodes between the two groups, the dietary data on the whole suggest that individuals in the low-GI group were consuming more low-GI foods than those in the CHOx group.

The quality-of-life questions revealed an obvious preference for the flexible low-GI dietary regimen among the children (and parents) who had experienced both types of dietary instruction. There were significant differences in measures

such as family conflict, limitations placed on family activities, difficulties for the child in selecting their own meals, and a clear preference to continue on the low-GI diet. These findings are important and challenge the belief that low-GI diets might be difficult to follow and a burden for people with diabetes. Furthermore, they need to be considered alongside the fact that glycemic control was superior among those who received the simpler, less regimented dietary advice. Using CHOx is often quoted as the most challenging aspect of managing diabetes (2,3).

The findings of this large long-term prospective study suggest that more flexible dietary instruction based on the food pyramid and with an emphasis on low-GI foods has demonstrable benefits for children with diabetes. Weighed-carbohydrate exchange dietary advice was associated with inferior glycemic control and measures of quality of life.

**Acknowledgments**— This study was supported by a grant from the Diabetes Australia Research Trust. We would like to thank Kay Gibbons (Nutrition and Food Services Department, RCH) for her advice, encouragement, and support; Rebecca Gebert and Warren Lee (Department of Endocrinology and Diabetes, RCH) for assistance with the questionnaire design; and Alison Caifai (Monash Medical Center, Clayton) for the initial study diet education sessions. We also extend a special thank you to the patients and families who participated in the study.

## References

1. The Diabetes Control and Complications Trial Research Group: The effect of intensive treatment of diabetes on the development and progression of long-term complications in insulin-dependent diabetes mellitus. *N Engl J Med* 329:977–986, 1993
2. Brink SJ: Pediatric, adolescent and young-adult nutrition issues in IDDM. *Diabetes Care* 11:192–200, 1988
3. Lockwood D, Frey ML, Gladish NA, Hiss RG: The biggest problem in diabetes. *Diabetes Educ* 12:30–33, 1986
4. Court J: *Modern Living With Diabetes: For All Ages*. 2nd ed. Melbourne, Australia, Diabetes Australia Victoria, 1991
5. National Health and Medical Research Council: *Dietary Guidelines for Australians*. Commonwealth of Australia, Canberra, Australia, Australian Government Publishing Service, 1992, p. 58–59
6. Jenkins DJA, Wolever TMS, Jenkins AL:

- Starchy foods and glycemic index. *Diabetes Care* 11:149–159, 1988
7. Jenkins DJA, Wolever TMS, Taylor RH, Barker H, Fielden H, Baldwin JM, Bowling A, Newman HC, Jenkins AL, Goff DV: Glycemic index of foods: a physiological basis for carbohydrate exchange. *Am J Clin Nutr* 34:362–366, 1981
  8. Brand Miller J, Foster-Powell K, Colagiuri S: *The GI Factor: The Glucose Revolution*. Australia, Hodder and Stoughton, 1998
  9. Mitchell RD, Nowakowska JA, Hurst AJ: Comparison of official 10g carbohydrate “exchange” system with simplified dietary advice in insulin dependent diabetics. *J Hum Nutr Dietetics* 3:19–26, 1990
  10. Price KJ, Lang JD, Eiser C, Tripp JH: Prescribed versus unrestricted carbohydrate diets in children with type 1 diabetes. *Diabet Med* 10:962–967, 1993
  11. Hackett AF, Court S, McCowen C, Parkin JM: Dietary survey of diabetics. *Arch Dis Child* 61:67–71, 1986
  12. Lorenz RA, Christensen NK, Pichert JW: Diet related knowledge, skill and adherence among children with insulin dependent diabetes mellitus. *Pediatrics* 75:872–876, 1985
  13. West KM: Diet therapy of diabetes: an analysis of failure. *Ann Intern Med* 79:425–434, 1973
  14. Waldron S: Current controversies in the dietary management of diabetes in childhood and adolescence. *Br J Hosp Med* 56:450–455, 1996
  15. Brand Miller JC: Importance of glycemic index in diabetes. *Am J Clin Nutr* 59 (Suppl. 1):747–752, 1994
  16. Jenkins DJA, Wolever TMS, Collier GR, Ocana A, Rao AV, Buckley G, Lam Y, Mayer A, Thompson LU: Metabolic effects of a low glycemic index diet. *Am J Clin Nutr* 46:968–975, 1987
  17. Brand JC, Colagiuri S, Crossman S, Allen A, Roberts D, Truswell AS: Low-glycemic index foods improve long-term glycemic control in NIDDM. *Diabetes Care* 14:95–101, 1991
  18. Frost G, Wilding J, Beecham J: Dietary advice based on the glycemic index improves dietary profile and metabolic control in type 2 diabetic patients. *Diabet Med* 11:397–401, 1994
  19. Fontvieille AM, Acosta M, Rizkalla SW, Bornet F, David P, Letanoux M, Tchobroutsky G, Slama G: A moderate switch from high to low glycaemic index foods for three weeks improves the metabolic control of type 1 (IDDM) diabetic subjects. *Diabet Nutr Metab* 1:139–143, 1988
  20. Giacco R, Parillo M, Rivellese AA, La-sorella G, Giacco A, D’Episcopo L, Riccardi G: Long-term dietary treatment with increased amounts of fiber-rich low-glycemic index natural foods improves blood glucose control and reduces the number of hypoglycemic events in type 1 diabetic patients. *Diabetes Care* 23:1461–1466, 2000
  21. Chiasson J-L: Glycemic index of foods and glycemic control in type 1 diabetes. *Curr Opin Endocrinol Diabet* 7:25–30, 2000
  22. Collier GR, Giudici S, Kalmusky J, Wolever TMS, Helman G, Wesson V, Ehrlich RM, Jenkins DJA: Low glycemic index starchy foods improve glucose control and lower serum cholesterol in diabetic children. *Diab Nutr Metab* 1:11–19, 1988
  23. Wolever TMS, Jenkins DJA, Collier GR, Ehrlich RM, Josse RG, Wong GS, Lee R: The glycaemic index: effect of age in insulin dependent diabetes mellitus. *Diabetes Res* 7:71–74, 1988
  24. Hackett AF, Appleton DR, Rugg-Gunn AJ, Eastoe JE: Some influences on the measurement of food intake during a dietary survey of adolescents. *Hum Nutr Appl Nutr* 39:167–177, 1985
  25. Paul AA, Southgate DAT: *McCance and Widdowson’s The Composition of Foods*. 4th ed. London, Her Majesty’s Stationery Office, 1978
  26. Schofield WN: Predicting basal metabolic rate, new standards and review of previous work. *Hum Nutr Clin Nutr* 39 (Suppl. 1):5–41, 1985
  27. Goldberg GR, Black AE, Jebb S, Cole TJ, Murgatroyd PR, Coward WA, Prentice AM: Critical evaluation of energy intake using fundamental principles of energy physiology. I. Derivation of cut-off limits to identify under-reporting. *Eur J Clin Nutr* 45:569–581, 1991
  28. Torun B, Davies PSW, Livingstone MBE, Paolisso M, Sackett R, Spurr GB: Energy requirements and dietary energy recommendations for children and adolescents 1 to 18 years old. *Eur J Clin Nutr* 50 (Suppl. 1):37–81, 1996
  29. NSW Health Department: *Principles of Care and Consensus Guidelines for the Management of Diabetes Mellitus in Children and Adolescents*. New South Wales Health Department, Sydney, 1998
  30. Australian Bureau of Statistics: *National Nutrition Survey; Selected Highlights 4802.0*. Canberra, Australia, Commonwealth Department of Health and Family Services, 1995
  31. Stuff JE, Garza C, O’Brian Smith E, Nichols BL, Montandon CM: A comparison of dietary methods in nutritional studies. *Am J Clin Nutr* 37:300–306, 1983
  32. Block G: A review of validations of dietary assessment methods. *Am J Epidemiol* 115:492–505, 1982
  33. Franz MJ: In defence of the American Diabetes Association’s recommendations on the glycemic index. *Nutr Today* 34:78–81, 1999
